# Supplementary material for: Improving Boron and Molybdenum Use Efficiencies in Contrasting Cultivars of Subirrigated Greenhouse-Grown Pot Chrysanthemums
Source: MDPI journal article supplement (doi:10.3390/plants12122348), 2023-06-16
Supplement: s1 [file s1]

# Improving Boron and Molybdenum Use Efficiencies in Contrasting Cultivars of Subirrigated Greenhouse-Grown Pot Chrysanthemums

Katherine R. Teeter-Wood <sup>1</sup>, Edward J. Flaherty <sup>1</sup>, Alyna J. Donetz <sup>1</sup>, Gordon J. Hoover <sup>1</sup>, William N. MacDonald <sup>2</sup>, Da-vid J. Wolyn <sup>1</sup> and Barry J. Shelp <sup>1,\*</sup>

<sup>1</sup> Department of Plant Agriculture, University of Guelph, Guelph, ON N1G 2W1, Canada; ktee-te02@uoguelph.ca (K.R.T.-W.);

eflahert@uoguelph.ca (E.J.F.); jane.donetz@gmail.com (A.J.D.);

ghoover@uoguelph.ca (G.J.H.); dwolyn@uoguelph.ca (D.J.W.)

<sup>2</sup> Agriculture Department, Niagara College Canada, Niagara-on-the-Lake, ON L0S 1J0, Canada; bmacdonald@niagaracollege.ca

\* Correspondence: bshelp@uoguelph.ca; Tel.: +519-931-9878

## Supplementary Tables

**Table S1.** Comparison of the nutrient solutions used in this study with four commercial fertilizers used in greenhouse floriculture.

| Nutrient                                    | This study    | Modified<br>Sonneveld<br>Solution<br>[12] | Fusion<br>Plant<br>Products<br>17-5-17 [10] | Peter's<br>Professional<br>17-3-17 [9] | Hoagland<br>Solution [11] |
|---------------------------------------------|---------------|-------------------------------------------|---------------------------------------------|----------------------------------------|---------------------------|
| <i>Macronutrients (mmol L<sup>-1</sup>)</i> |               |                                           |                                             |                                        |                           |
| Nitrogen                                    | 7.13          | 18.50                                     | 20.40                                       | 20.40                                  | 10.5                      |
| Phosphorus                                  | 1.00          | 2.60                                      | 2.85                                        | 1.62                                   | 1.00                      |
| Potassium                                   | 3.51          | 9.10                                      | 7.29                                        | 7.29                                   | 6.00                      |
| Calcium                                     | 2.60          | 6.75                                      | 1.25                                        | 1.67                                   | 5.00                      |
| Magnesium                                   | 0.58          | 1.50                                      | 0.69                                        | 0.86                                   | 2.00                      |
| Sulfur                                      | 0.88          | 2.25                                      | -                                           | -                                      | 1.99                      |
| <i>Micronutrients (μmol L<sup>-1</sup>)</i> |               |                                           |                                             |                                        |                           |
| Iron                                        | 5.28          | 25.00                                     | 30.10                                       | 25.60                                  | 15.00                     |
| Manganese                                   | 2.50          | 5.00                                      | 15.10                                       | 12.90                                  | 9.10                      |
| Zinc                                        | 3.50          | 3.50                                      | 12.70                                       | 10.80                                  | 0.76                      |
| Copper                                      | 0.75          | 0.75                                      | 13.10                                       | 4.72                                   | 0.31                      |
| Boron                                       | 5.00 – 0.31   | 5.00                                      | 31.50                                       | 31.50                                  | 46.25                     |
| Molybdenum                                  | 0.500 – 0.031 | 0.50                                      | 2.70                                        | 1.45                                   | 0.11                      |

**Table S2.** Summary of significant effects on the morphological characteristics of ‘Milton Dark Pink’ and ‘Williamsburg Purple’ chrysanthemum cultivars supplied with varying levels of B up to bud break in summer 2021 (experiment 1) and winter/spring 2022 (experiment 2).

| Effect               | Shoot height<br>(cm plant <sup>-1</sup> ) | Shoot DM<br>(g plant <sup>-1</sup> ) | Inflor. DM<br>(g plant <sup>-1</sup> ) | Bloom dia.<br>(cm plant <sup>-1</sup> ) | Bud/inflor. no.<br>(total plant <sup>-1</sup> ) | Inflor. dev.<br>(stage plant <sup>-1</sup> ) |
|----------------------|-------------------------------------------|--------------------------------------|----------------------------------------|-----------------------------------------|-------------------------------------------------|----------------------------------------------|
| Experiment 1         |                                           |                                      |                                        |                                         |                                                 |                                              |
| Treatment            |                                           |                                      |                                        |                                         |                                                 |                                              |
| Cultivar             | *                                         | *                                    | *                                      | *                                       | *                                               | *                                            |
| Treatment x cultivar | *                                         |                                      |                                        |                                         |                                                 |                                              |
| Experiment 2         |                                           |                                      |                                        |                                         |                                                 |                                              |
| Treatment            |                                           |                                      |                                        |                                         |                                                 |                                              |
| Cultivar             |                                           | *                                    | *                                      | *                                       | *                                               | *                                            |
| Treatment x cultivar | *                                         | *                                    | *                                      |                                         | *                                               | *                                            |

\*, indicates significance ( $P \leq 0.05$ ). Abbreviations: inflor., inflorescences; dia., diameter; dev., development; DM, dry mass; no., number.

**Table S3.** Summary of significant effects on the inflorescence development of ‘Milton Dark Pink’ and ‘Williamsburg Purple’ cultivars supplied with varying levels of B up to bud break in summer 2021 (experiment 1) and winter/spring 2022 (experiment 2).

| Effect                      | Experiment 1 | Experiment 2 |
|-----------------------------|--------------|--------------|
| Treatment                   |              |              |
| Time                        | *            | *            |
| Cultivar                    | *            | *            |
| Time x treatment            |              |              |
| Treatment x cultivar        | *            | *            |
| Time x cultivar             | *            | *            |
| Time x treatment x cultivar |              |              |

\*, indicates significance ( $P \leq 0.05$ ).

**Table S4.** Summary of significant effects on leaf nutrient composition of ‘Milton Dark Pink’ and ‘Williamsburg Purple’ chrysanthemum cultivars supplied with varying levels of B up to bud break in summer 2021 (experiment 1) and winter/spring 2022 (experiment 2).

| Effect               | Macronutrient concentration<br>(% DM) |   |   |    |    |   | Micronutrient concentration<br>(mg kg <sup>-1</sup> DM) |    |    |    |    |    |
|----------------------|---------------------------------------|---|---|----|----|---|---------------------------------------------------------|----|----|----|----|----|
|                      | N                                     | P | K | Ca | Mg | S | B                                                       | Mo | Cu | Zn | Mn | Fe |
| Experiment 1         |                                       |   |   |    |    |   |                                                         |    |    |    |    |    |
| Treatment            |                                       |   |   |    |    |   |                                                         |    | *  |    |    |    |
| Cultivar             | *                                     | * |   | *  | *  | * | *                                                       | *  |    | *  |    |    |
| Treatment x cultivar |                                       |   |   |    |    |   |                                                         |    |    |    |    |    |
| Experiment 2         |                                       |   |   |    |    |   |                                                         |    |    |    |    |    |
| Treatment            |                                       |   |   |    |    |   | *                                                       |    |    |    |    |    |
| Cultivar             |                                       | * |   | *  | *  | * |                                                         | *  | *  | *  | *  |    |
| Treatment x cultivar |                                       |   |   |    |    |   |                                                         |    |    |    |    |    |

\*, indicates significance ( $P \leq 0.05$ ).

**Table S5.** Bud/inflorescence number of two chrysanthemum cultivars supplied with varying levels of B up to bud break in summer 2021 (experiment 1) and winter/spring 2022 (experiment 2).

| Cultivar                 | B supply<br>( $\mu\text{mol L}^{-1}$ ) | Days from bud emergence |           |          |          |          |          |          |
|--------------------------|----------------------------------------|-------------------------|-----------|----------|----------|----------|----------|----------|
|                          |                                        | 0                       | 7         | 14       | 21       | 28       | 35       | 42       |
| Experiment 1             |                                        |                         |           |          |          |          |          |          |
| ‘Milton Dark<br>Pink’    | 5.00                                   | 33.3                    | 35.3      | 34.0     | 32.1     | 32.7     | 33.9     | -        |
|                          | 2.50                                   | 31.1                    | 32.5      | 32.3     | 30.9     | 31.5     | 32.4     | -        |
|                          | 1.25                                   | 31.0                    | 32.2      | 31.6     | 30.5     | 30.7     | 30.9     | -        |
| ‘Williamsburg<br>Purple’ | 5.00                                   | 29.3 $Y$                | 35.8 $Z$  | 37.8 $Z$ | 37.1 $Z$ | 35.4 $Z$ | 34.4 $Z$ | 36.1 $Z$ |
|                          | 2.50                                   | 32.0 $Y$                | 36.3 $Z$  | 37.4 $Z$ | 35.3 $Z$ | 33.7 $Z$ | 34.6 $Z$ | 34.8 $Z$ |
|                          | 1.25                                   | 28.7 $Y$                | 32.8 $YZ$ | 34.3 $Z$ | 32.2 $Z$ | 31.4 $Z$ | 31.5 $Z$ | 31.1 $Z$ |
| Experiment 2             |                                        |                         |           |          |          |          |          |          |
| ‘Milton Dark<br>Pink’    | 1.25                                   | 26.7                    | 27.4      | 26.7     | 26.9     | 25.5     | -        | -        |
|                          | 0.63                                   | 26.8                    | 26.6      | 26.8     | 26.4     | 25.7     | -        | -        |
|                          | 0.31                                   | 27.5                    | 27.4      | 27.1     | 26.8     | 26.2     | -        | -        |
| ‘Williamsburg<br>Purple’ | 1.25                                   | 25.3 $Y$                | 28.5 $Z$  | 27.3 $Z$ | 26.9 $Z$ | 26.5 $Z$ | 23.0 $Y$ | -        |
|                          | 0.63                                   | 27.7 $Y$                | 30.2 $Y$  | 29.4 $Y$ | 29.0 $Y$ | 28.3 $Y$ | 24.3 $Z$ | -        |
|                          | 0.31                                   | 25.7 $YZ$               | 28.6 $Y$  | 27.8 $Y$ | 27.2 $Y$ | 26.9 $Y$ | 23.6 $Z$ | -        |

Stage was assessed weekly from bud break (stage 1) to harvest. Means ( $n = 4$ ) within cultivars are not significantly different across treatment according to Tukey’s honest significant difference test ( $P \leq 0.05$ ). Means sharing the same uppercase letters within cultivars are not significantly different across time ( $P \leq 0.05$ ).

**Table S6.** Stage of bud/inflorescence development in two chrysanthemum cultivars supplied with varying levels of B up to bud break in summer 2021 (experiment 1) and winter/spring 2022 (experiment 2).

| Cultivar                 | B supply<br>( $\mu\text{mol L}^{-1}$ ) | Days from bud emergence |      |      |      |        |       |      |
|--------------------------|----------------------------------------|-------------------------|------|------|------|--------|-------|------|
|                          |                                        | 0                       | 7    | 14   | 21   | 28     | 35    | 42   |
| Experiment 1             |                                        |                         |      |      |      |        |       |      |
| ‘Milton Dark<br>Pink’    | 5.00                                   | 1.0V                    | 1.0V | 1.3W | 2.2X | 3.2aY  | 3.9Z  | -    |
|                          | 2.50                                   | 1.0V                    | 1.0V | 1.2W | 2.1X | 3.1abY | 3.9Z  | -    |
|                          | 1.25                                   | 1.0V                    | 1.0V | 1.3W | 2.2X | 3.1bY  | 3.9Z  | -    |
| ‘Williamsburg<br>Purple’ | 5.00                                   | 1.0V                    | 1.0V | 1.0V | 1.4W | 2.0X   | 2.6Y  | 3.3Z |
|                          | 2.50                                   | 1.0V                    | 1.0V | 1.1V | 1.5W | 2.0X   | 2.6Y  | 3.4Z |
|                          | 1.25                                   | 1.0V                    | 1.0V | 1.0V | 1.4W | 1.9X   | 2.5Y  | 3.3Z |
| Experiment 2             |                                        |                         |      |      |      |        |       |      |
| ‘Milton Dark<br>Pink’    | 1.25                                   | 1.0W                    | 1.1W | 1.7X | 2.8Y | 4.1aZ  | -     | -    |
|                          | 0.63                                   | 1.0V                    | 1.2W | 1.8X | 2.8Y | 4.1abZ | -     | -    |
|                          | 0.31                                   | 1.0V                    | 1.2W | 1.8X | 2.8Y | 4.3bZ  | -     | -    |
| ‘Williamsburg<br>Purple’ | 1.25                                   | 1.0V                    | 1.0V | 1.4W | 2.0X | 2.5Y   | 3.6aZ | -    |
|                          | 0.63                                   | 1.0V                    | 1.0V | 1.4W | 2.0X | 2.5Y   | 3.5aZ | -    |
|                          | 0.31                                   | 1.0V                    | 1.0V | 1.4W | 2.0X | 2.5Y   | 3.3bZ | -    |

Stage was assessed weekly from bud break (stage 1) to harvest. Means ( $n = 4$ ) sharing the same lowercase letters within cultivars are not significantly different across treatment according to Tukey's honest significant difference test ( $P \leq 0.05$ ). Means sharing the same uppercase letters within cultivars are not significantly different across time ( $P \leq 0.05$ ). Stage 1: a formed bud that is completely closed; stage 2 the bloom beginning to emerge from the bud with visible petal colour; stage 3: the bloom opening with fully vertical petals but still mostly closed with sepals approximately half the petal length; stage 4: the bloom opening and mostly open; stage 5: a fully opened bloom; and stage 6: a fully opened bloom in the early stages of petal-tip senescence with fully opened disk flowers.

**Table S7.** Macronutrient accumulation by the shoot at harvest of two chrysanthemum cultivars supplied with varying levels of B until bud break in summer 2021 (experiment 1) and winter/spring 2022 (experiment 2).

| Cultivar                 | B supply<br>( $\mu\text{mol L}^{-1}$ ) | Shoot accumulation (g shoot <sup>-1</sup> ) |      |      |      |      |      |
|--------------------------|----------------------------------------|---------------------------------------------|------|------|------|------|------|
|                          |                                        | N                                           | P    | K    | Ca   | Mg   | S    |
| Experiment 1             |                                        |                                             |      |      |      |      |      |
| ‘Milton Dark<br>Pink’    | 5.00                                   | 1.68                                        | 0.32 | 1.93 | 0.64 | 0.22 | 1.10 |
|                          | 2.50                                   | 1.74                                        | 0.33 | 2.01 | 0.67 | 0.23 | 1.13 |
|                          | 1.25                                   | 1.62                                        | 0.31 | 1.86 | 0.61 | 0.21 | 1.03 |
| ‘Williamsburg<br>Purple’ | 5.00                                   | 1.96                                        | 0.33 | 2.29 | 0.59 | 0.21 | 1.19 |
|                          | 2.50                                   | 1.97                                        | 0.33 | 2.28 | 0.58 | 0.21 | 1.14 |
|                          | 1.25                                   | 1.92                                        | 0.32 | 2.23 | 0.57 | 0.21 | 1.13 |
| Experiment 2             |                                        |                                             |      |      |      |      |      |
| ‘Milton Dark<br>Pink’    | 1.25                                   | 1.11                                        | 0.20 | 1.22 | 0.36 | 0.15 | 0.67 |
|                          | 0.63                                   | 1.07                                        | 0.20 | 1.18 | 0.35 | 0.14 | 0.67 |
|                          | 0.31                                   | 1.12                                        | 0.21 | 1.33 | 0.38 | 0.15 | 0.78 |
| ‘Williamsburg<br>Purple’ | 1.25                                   | 1.20                                        | 0.20 | 1.33 | 0.31 | 0.12 | 0.76 |
|                          | 0.63                                   | 1.23                                        | 0.21 | 1.39 | 0.33 | 0.13 | 0.80 |
|                          | 0.31                                   | 1.19                                        | 0.19 | 1.31 | 0.30 | 0.12 | 0.72 |

Each replicate is based on a single analytical determination of a subsample taken from the pooled tissues of 10 individual plants. Means ( $n = 4$ ) within columns and cultivars are not significantly different according to the Tukey’s honest significant difference test ( $P \leq 0.05$ ).

**Table S8.** Micronutrient accumulation by the shoot at harvest of two chrysanthemum cultivars supplied with varying levels of B until flower bud break in summer 2021 (experiment 1) and winter/spring 2022 (experiment 2).

| Cultivar                 | B supply<br>( $\mu\text{mol L}^{-1}$ ) | Shoot accumulation (mg shoot <sup>-1</sup> ) |      |                |                |      |      |
|--------------------------|----------------------------------------|----------------------------------------------|------|----------------|----------------|------|------|
|                          |                                        | B                                            | Mo   | Cu             | Zn             | Mn   | Fe   |
| Experiment 1             |                                        |                                              |      |                |                |      |      |
| ‘Milton Dark<br>Pink’    | 5.00                                   | 2.26 <i>a</i>                                | 0.23 | 0.30 <i>ab</i> | 2.22 <i>ab</i> | 3.75 | 5.28 |
|                          | 2.50                                   | 1.67 <i>b</i>                                | 0.24 | 0.32 <i>a</i>  | 2.39 <i>a</i>  | 3.77 | 6.78 |
|                          | 1.25                                   | 1.19 <i>c</i>                                | 0.22 | 0.28 <i>b</i>  | 2.10 <i>b</i>  | 3.36 | 4.10 |
| ‘Williamsburg<br>Purple’ | 5.00                                   | 2.33 <i>a</i>                                | 0.24 | 0.36           | 2.31           | 3.42 | 4.93 |
|                          | 2.50                                   | 1.88 <i>a</i>                                | 0.24 | 0.37           | 2.50           | 3.72 | 5.09 |
|                          | 1.25                                   | 1.36 <i>b</i>                                | 0.23 | 0.34           | 2.20           | 3.72 | 5.47 |
| Experiment 2             |                                        |                                              |      |                |                |      |      |
| ‘Milton Dark<br>Pink’    | 1.25                                   | 0.52                                         | 0.15 | 0.12           | 1.04           | 2.01 | 2.14 |
|                          | 0.63                                   | 0.48                                         | 0.15 | 0.11           | 1.02           | 1.44 | 1.79 |
|                          | 0.31                                   | 0.58                                         | 0.15 | 0.12           | 1.16           | 1.73 | 2.22 |
| ‘Williamsburg<br>Purple’ | 1.25                                   | 0.52                                         | 0.15 | 0.12           | 1.01           | 2.25 | 2.37 |
|                          | 0.63                                   | 0.54                                         | 0.16 | 0.12           | 1.06           | 2.58 | 2.73 |
|                          | 0.31                                   | 0.46                                         | 0.16 | 0.11           | 0.93           | 2.50 | 2.29 |

Each replicate is based on a single analytical determination of a subsample taken from the pooled tissues of 10 individual plants. Means ( $n = 4$ ) that are significantly different ( $P \leq 0.05$ ) within columns and cultivars according to the Tukey’s honest significant difference test are designated by different letters.

**Table S9.** Summary of significant effects on the morphological characteristics of ‘Milton Dark Pink’, ‘Williamsburg Purple’, and ‘Mount Aubisque Purple’ chrysanthemum cultivars supplied with varying levels of Mo up to bud break in summer 2021 (experiment 1) and winter/spring 2022 (experiment 2).

| Effect               | Shoot height<br>(cm plant <sup>-1</sup> ) | Shoot DM<br>(g plant <sup>-1</sup> ) | Inflor. DM<br>(g plant <sup>-1</sup> ) | Bloom dia.<br>(cm plant <sup>-1</sup> ) | Bud/inflor. no.<br>(total plant <sup>-1</sup> ) | Inflor. dev.<br>(stage plant <sup>-1</sup> ) | Greenness<br>(SPAD value) |
|----------------------|-------------------------------------------|--------------------------------------|----------------------------------------|-----------------------------------------|-------------------------------------------------|----------------------------------------------|---------------------------|
| Experiment 1         |                                           |                                      |                                        |                                         |                                                 |                                              |                           |
| Treatment            |                                           |                                      |                                        |                                         |                                                 |                                              |                           |
| Cultivar             |                                           | *                                    | *                                      | *                                       | *                                               | *                                            | *                         |
| Treatment x cultivar | *                                         | *                                    | *                                      | *                                       |                                                 | *                                            | *                         |
| Experiment 2         |                                           |                                      |                                        |                                         |                                                 |                                              |                           |
| Treatment            |                                           |                                      |                                        |                                         |                                                 |                                              | *                         |
| Cultivar             |                                           | *                                    | *                                      | *                                       | *                                               | *                                            | *                         |
| Treatment x cultivar |                                           |                                      |                                        | *                                       |                                                 |                                              |                           |

\*, indicates significance ( $P \leq 0.05$ ) Greenness was determined at bud emergence. Abbreviations: inflor., inflorescence; dia., diameter; dev., development; DM, dry mass.

**Table S10.** Summary of significant effects on the inflorescence development of ‘Milton Dark Pink’, ‘Williamsburg Purple’, and ‘Mount Aubisque Purple’ chrysanthemum cultivars supplied with varying levels of Mo up to bud break in summer 2021 (experiment 1) and winter/spring 2022 (experiment 2).

| Effect                      | Experiment 1 | Experiment 2 |
|-----------------------------|--------------|--------------|
| Treatment                   |              |              |
| Time                        | *            | *            |
| Cultivar                    | *            | *            |
| Time x treatment            | *            |              |
| Treatment x cultivar        | *            | *            |
| Time x cultivar             | *            | *            |
| Time x treatment x cultivar | *            |              |

\*, indicates significance ( $P \leq 0.05$ ).

**Table S11.** Summary of significant effects on leaf nutrient composition of ‘Milton Dark Pink’, ‘Williamsburg Purple’, and ‘Mount Aubisque Purple’ chrysanthemum cultivars supplied with varying levels of Mo up to bud break in summer 2021 (experiment 1) and winter/spring 2022 (experiment 2).

| Effect               | Macronutrient concentration<br>(% DM) |   |   |    |    |   | Micronutrient concentration<br>(mg kg <sup>-1</sup> DM) |   |    |    |    |    |
|----------------------|---------------------------------------|---|---|----|----|---|---------------------------------------------------------|---|----|----|----|----|
|                      | N                                     | P | K | Ca | Mg | S | Mo                                                      | B | Cu | Zn | Mn | Fe |
| Experiment 1         |                                       |   |   |    |    |   |                                                         |   |    |    |    |    |
| Treatment            |                                       |   |   |    |    |   |                                                         |   |    |    |    |    |
| Cultivar             |                                       |   | * | *  | *  | * | *                                                       | * | *  |    |    |    |
| Treatment x cultivar |                                       |   |   |    |    |   |                                                         |   |    |    |    |    |
| Experiment 2         |                                       |   |   |    |    |   |                                                         |   |    |    |    |    |
| Treatment            |                                       |   |   |    |    |   | *                                                       | * |    |    |    |    |
| Cultivar             | *                                     | * | * | *  | *  | * | *                                                       | * | *  | *  |    |    |
| Treatment x cultivar |                                       |   |   |    |    |   |                                                         |   |    |    |    |    |

\*, indicates significance ( $P \leq 0.05$ ).

**Table S12.** Bud/inflorescence number in two chrysanthemum cultivars supplied with varying levels of Mo up to bud break in summer 2021 (experiment 1) and winter/spring 2022 (experiment 2).

| Cultivar                      | Mo supply<br>( $\mu\text{mol L}^{-1}$ ) | Days from bud emergence |      |      |      |                    |                    |                    |
|-------------------------------|-----------------------------------------|-------------------------|------|------|------|--------------------|--------------------|--------------------|
|                               |                                         | 0                       | 7    | 14   | 21   | 28                 | 35                 | 42                 |
| Experiment 1                  |                                         |                         |      |      |      |                    |                    |                    |
| ‘Milton Dark<br>Pink’         | 0.500                                   | 35.7                    | 36.8 | 35.0 | 35.1 | 35.6               | 35.8               | -                  |
|                               | 0.250                                   | 37.5                    | 39.6 | 37.0 | 38.4 | 37.5               | 38.3               | -                  |
|                               | 0.125                                   | 37.3                    | 38.0 | 35.9 | 35.1 | 36.2               | 36.6               | -                  |
| ‘Williamsburg<br>Purple’      | 0.500                                   | 34.6                    | 36.4 | 35.0 | 33.4 | 34.2 <sup>ab</sup> | 34.2 <sup>a</sup>  | 33.1               |
|                               | 0.250                                   | 35.1                    | 37.4 | 34.7 | 34.7 | 34.6 <sup>bc</sup> | 34.0 <sup>ab</sup> | 34.6               |
|                               | 0.125                                   | 34.4                    | 36.5 | 34.1 | 34.3 | 33.5 <sup>ac</sup> | 32.7 <sup>b</sup>  | 32.6               |
| Experiment 2                  |                                         |                         |      |      |      |                    |                    |                    |
| ‘Milton Dark<br>Pink’         | 0.125                                   | 32.9                    | 32.2 | 32.4 | 32.1 | 31.0               | -                  | -                  |
|                               | 0.063                                   | 30.5                    | 30.8 | 31.1 | 30.4 | 29.4               | -                  | -                  |
|                               | 0.031                                   | 31.1                    | 30.8 | 30.6 | 30.7 | 29.7               | -                  | -                  |
| ‘Mount<br>Aubisque<br>Purple’ | 0.125                                   | 25.5                    | 25.5 | 24.3 | 25.6 | 24.7               | 24.1 <sup>ab</sup> | 23.9 <sup>ab</sup> |
|                               | 0.063                                   | 26.3                    | 26.3 | 26.0 | 26.0 | 25.3               | 25.1 <sup>ab</sup> | 24.4 <sup>ac</sup> |
|                               | 0.031                                   | 25.6                    | 26.1 | 25.5 | 26.6 | 25.9               | 24.9 <sup>bc</sup> | 24.6 <sup>bc</sup> |

Means (n =4) sharing the same lowercase letters within cultivars are not significantly different across treatment according to Tukey’s honest significant difference test ( $P \leq 0.05$ ). Means within cultivars are not significantly different across time ( $P \leq 0.05$ ).

**Table S13.** Bud/inflorescence stage of three chrysanthemum cultivars supplied with varying levels of Mo up to bud break in summer 2021 (experiment 1) and winter/spring 2022 (experiment 2).

| Cultivar                      | Mo supply<br>( $\mu\text{mol L}^{-1}$ ) | Days from bud emergence |         |          |          |         |          |         |
|-------------------------------|-----------------------------------------|-------------------------|---------|----------|----------|---------|----------|---------|
|                               |                                         | 0                       | 7       | 14       | 21       | 28      | 35       | 42      |
| Experiment 1                  |                                         |                         |         |          |          |         |          |         |
| ‘Milton Dark<br>Pink’         | 0.500                                   | 1.0                     | 1.3     | 2.1 $a$  | 2.8 $a$  | 3.3 $a$ | 3.9 $a$  | -       |
|                               | 0.250                                   | 1.1                     | 1.5     | 2.4 $b$  | 3.1 $b$  | 3.6 $b$ | 4.2 $b$  | -       |
|                               | 0.125                                   | 1.0                     | 1.4     | 2.2 $ab$ | 2.9 $ab$ | 3.3 $a$ | 3.8 $ab$ | -       |
| ‘Williamsburg<br>Purple’      | 0.500                                   | 1.0 $V$                 | 1.0 $V$ | 1.1 $V$  | 1.6 $W$  | 2.0 $X$ | 2.5 $Y$  | 3.3 $Z$ |
|                               | 0.250                                   | 1.0 $V$                 | 1.0 $V$ | 1.1 $V$  | 1.5 $W$  | 2.0 $X$ | 2.6 $Y$  | 3.2 $Z$ |
|                               | 0.125                                   | 1.0 $V$                 | 1.0 $V$ | 1.1 $V$  | 1.6 $W$  | 2.0 $X$ | 2.6 $Y$  | 3.3 $Z$ |
| Experiment 2                  |                                         |                         |         |          |          |         |          |         |
| ‘Milton Dark<br>Pink’         | 0.125                                   | 1.1 $W$                 | 1.2 $W$ | 2.0 $X$  | 3.1 $Y$  | 4.2 $Z$ | -        | -       |
|                               | 0.063                                   | 1.1 $W$                 | 1.2 $W$ | 2.0 $X$  | 3.0 $Y$  | 4.1 $Z$ | -        | -       |
|                               | 0.031                                   | 1.1 $W$                 | 1.3 $W$ | 2.1 $X$  | 3.1 $Y$  | 4.3 $Z$ | -        | -       |
| ‘Mount<br>Aubisque<br>Purple’ | 0.125                                   | 1.0 $T$                 | 1.4 $U$ | 2.4 $V$  | 3.0 $W$  | 3.4 $X$ | 3.8 $Y$  | 4.3 $Z$ |
|                               | 0.063                                   | 1.0 $T$                 | 1.4 $U$ | 2.3 $V$  | 3.0 $W$  | 3.3 $X$ | 3.7 $Y$  | 4.3 $Z$ |
|                               | 0.031                                   | 1.0 $T$                 | 1.4 $U$ | 2.2 $V$  | 2.9 $W$  | 3.3 $X$ | 3.7 $Y$  | 4.3 $Z$ |

Stage was assessed weekly from bud break (stage 1) to harvest. Data represent the mean of four treatment replicates rounded to the nearest tenth; each replicate consists of 10 individual plants. Means ( $n = 4$ ) sharing the same lowercase letters within cultivars are not significantly different across treatment according to Tukey’s honest significant difference test ( $P \leq 0.05$ ). Means sharing the same uppercase letters within cultivars are not significantly different across time ( $P \leq 0.05$ ). Stage 1: a formed bud that is completely closed; stage 2 the bloom beginning to emerge from the bud with visible petal colour; stage 3: the bloom opening with fully vertical petals but still mostly closed with sepals approximately half the petal length; stage 4: the bloom opening and mostly open; stage 5: a fully opened bloom; and stage 6: a fully opened bloom in the early stages of petal-tip senescence with fully opened disk flowers.

**Table S14.** Macronutrient accumulation by the shoot at harvest of three chrysanthemum cultivars supplied with varying levels of Mo until flower bud break in summer 2021 (experiment 1) and winter/spring 2022 (experiment 2).

| Cultivar                      | Mo supply<br>( $\mu\text{mol L}^{-1}$ ) | Shoot accumulation (g shoot <sup>-1</sup> ) |      |      |                |      |      |
|-------------------------------|-----------------------------------------|---------------------------------------------|------|------|----------------|------|------|
|                               |                                         | N                                           | P    | K    | Ca             | Mg   | S    |
| Experiment 1                  |                                         |                                             |      |      |                |      |      |
| ‘Milton Dark<br>Pink’         | 0.500                                   | 1.45                                        | 0.26 | 1.84 | 0.56 <i>b</i>  | 0.18 | 1.03 |
|                               | 0.250                                   | 1.63                                        | 0.29 | 2.08 | 0.64 <i>a</i>  | 0.21 | 1.17 |
|                               | 0.125                                   | 1.49                                        | 0.27 | 1.89 | 0.58 <i>ab</i> | 0.20 | 1.05 |
| ‘Williamsburg<br>Purple’      | 0.500                                   | 1.67                                        | 0.27 | 2.04 | 0.51           | 0.18 | 1.00 |
|                               | 0.250                                   | 1.74                                        | 0.28 | 2.08 | 0.51           | 0.18 | 1.00 |
|                               | 0.125                                   | 1.74                                        | 0.28 | 2.11 | 0.52           | 0.17 | 1.04 |
| Experiment 2                  |                                         |                                             |      |      |                |      |      |
| ‘Milton Dark<br>Pink’         | 0.125                                   | 1.37                                        | 0.24 | 1.58 | 0.52           | 0.18 | 0.91 |
|                               | 0.063                                   | 1.37                                        | 0.24 | 1.58 | 0.51           | 0.18 | 0.91 |
|                               | 0.031                                   | 1.34                                        | 0.24 | 1.57 | 0.52           | 0.18 | 0.94 |
| ‘Mount<br>Aubisque<br>Purple’ | 0.125                                   | 1.38                                        | 0.24 | 1.68 | 0.49           | 0.16 | 1.40 |
|                               | 0.063                                   | 1.45                                        | 0.24 | 1.71 | 0.49           | 0.17 | 1.37 |
|                               | 0.031                                   | 1.50                                        | 0.24 | 1.75 | 0.50           | 0.17 | 1.35 |

Each replicate is based on a single analytical determination of a subsample taken from the pooled tissues of 10 individual plants. Means ( $n = 4$ ) that are significantly different ( $P \leq 0.05$ ) within columns and cultivars according to the Tukey’s honest significant difference test are designated by different letters.

**Table S15.** Micronutrient accumulation by the shoot at harvest of three chrysanthemum cultivars supplied with varying levels of Mo until flower bud break in summer 2021 (experiment 1) and winter/spring 2022 (experiment 2).

| Cultivar                      | Mo supply<br>( $\mu\text{mol L}^{-1}$ ) | Shoot accumulation (mg shoot <sup>-1</sup> ) |                |      |      |                |      |
|-------------------------------|-----------------------------------------|----------------------------------------------|----------------|------|------|----------------|------|
|                               |                                         | Mo                                           | B              | Cu   | Zn   | Mn             | Fe   |
| Summer 2021                   |                                         |                                              |                |      |      |                |      |
| ‘Milton Dark<br>Pink’         | 0.500                                   | 0.16 <i>a</i>                                | 2.04 <i>b</i>  | 0.49 | 1.70 | 2.74           | 3.06 |
|                               | 0.250                                   | 0.14 <i>ab</i>                               | 2.29 <i>a</i>  | 0.46 | 1.92 | 3.00           | 3.46 |
|                               | 0.125                                   | 0.08 <i>b</i>                                | 2.09 <i>ab</i> | 0.57 | 1.62 | 2.98           | 2.93 |
| ‘Williamsburg<br>Purple’      | 0.500                                   | 0.21 <i>a</i>                                | 2.06           | 0.25 | 1.63 | 3.02           | 3.90 |
|                               | 0.250                                   | 0.15 <i>b</i>                                | 2.14           | 0.25 | 1.65 | 3.09           | 3.38 |
|                               | 0.125                                   | 0.12 <i>b</i>                                | 2.08           | 0.24 | 1.70 | 2.87           | 3.74 |
| Winter/Spring 2022            |                                         |                                              |                |      |      |                |      |
| ‘Milton Dark<br>Pink’         | 0.125                                   | 0.09 <i>a</i>                                | 2.07           | 0.16 | 1.53 | 3.26 <i>ab</i> | 2.51 |
|                               | 0.063                                   | 0.05 <i>b</i>                                | 2.05           | 0.17 | 1.55 | 3.67 <i>a</i>  | 2.47 |
|                               | 0.031                                   | 0.05 <i>b</i>                                | 2.08           | 0.17 | 1.46 | 2.28 <i>b</i>  | 2.36 |
| ‘Mount<br>Aubisque<br>Purple’ | 0.125                                   | 0.13                                         | 2.36           | 0.21 | 1.78 | 3.45           | 3.30 |
|                               | 0.063                                   | 0.08                                         | 2.42           | 0.20 | 1.76 | 3.48           | 3.28 |
|                               | 0.031                                   | 0.08                                         | 2.48           | 0.20 | 1.81 | 3.68           | 3.79 |

Each replicate is based on a single analytical determination of a subsample taken from the pooled tissues of 10 individual plants. Means ( $n = 4$ ) that are significantly different ( $P \leq 0.05$ ) within columns and cultivars according to the Tukey’s honest significant difference test are designated by different letters.

**Table S16.** Composition of nutrient solutions used for the two B experiments.

| Macronutrient (mmol L <sup>-1</sup> ) |      | Micronutrient (μmol L <sup>-1</sup> )         |         | Treatment |      |      |
|---------------------------------------|------|-----------------------------------------------|---------|-----------|------|------|
|                                       |      |                                               |         | T1        | T2   | T3   |
| Ca(NO <sub>3</sub> ) <sub>2</sub>     | 2.60 | Fe-EDDHA                                      | 5.28    |           |      |      |
| KNO <sub>3</sub>                      | 1.93 | MnSO <sub>4</sub>                             | 2.50    |           |      |      |
| KH <sub>2</sub> PO <sub>4</sub>       | 1.00 | ZnSO <sub>4</sub>                             | 3.50    |           |      |      |
| K <sub>2</sub> SO <sub>4</sub>        | 0.29 | CuSO <sub>4</sub>                             | 0.75    |           |      |      |
| MgSO <sub>4</sub>                     | 0.58 | Na <sub>2</sub> MoO <sub>4</sub>              | 0.50    |           |      |      |
|                                       |      | Na <sub>2</sub> B <sub>4</sub> O <sub>7</sub> | Expt. 1 | 5.00      | 2.50 | 1.25 |
|                                       |      | Na <sub>2</sub> B <sub>4</sub> O <sub>7</sub> | Expt. 2 | 1.25      | 0.63 | 0.31 |

**Table S17.** Composition of nutrient solutions used for the two Mo experiments.

| Macronutrient (mmol L <sup>-1</sup> ) |      | Micronutrient (μmol L <sup>-1</sup> )         |         | Treatment |       |       |
|---------------------------------------|------|-----------------------------------------------|---------|-----------|-------|-------|
|                                       |      |                                               |         | T1        | T2    | T3    |
| Ca(NO <sub>3</sub> ) <sub>2</sub>     | 2.60 | Fe-EDDHA                                      | 5.28    |           |       |       |
| KNO <sub>3</sub>                      | 1.93 | MnSO <sub>4</sub>                             | 2.50    |           |       |       |
| KH <sub>2</sub> PO <sub>4</sub>       | 1.00 | ZnSO <sub>4</sub>                             | 3.50    |           |       |       |
| K <sub>2</sub> SO <sub>4</sub>        | 0.29 | CuSO <sub>4</sub>                             | 0.75    |           |       |       |
| MgSO <sub>4</sub>                     | 0.58 | Na <sub>2</sub> B <sub>4</sub> O <sub>7</sub> | 5.00    |           |       |       |
|                                       |      | Na <sub>2</sub> MoO <sub>4</sub>              | Expt. 1 | 0.500     | 0.250 | 0.125 |
|                                       |      | Na <sub>2</sub> MoO <sub>4</sub>              | Expt. 2 | 0.125     | 0.063 | 0.031 |

## Supplementary Figures

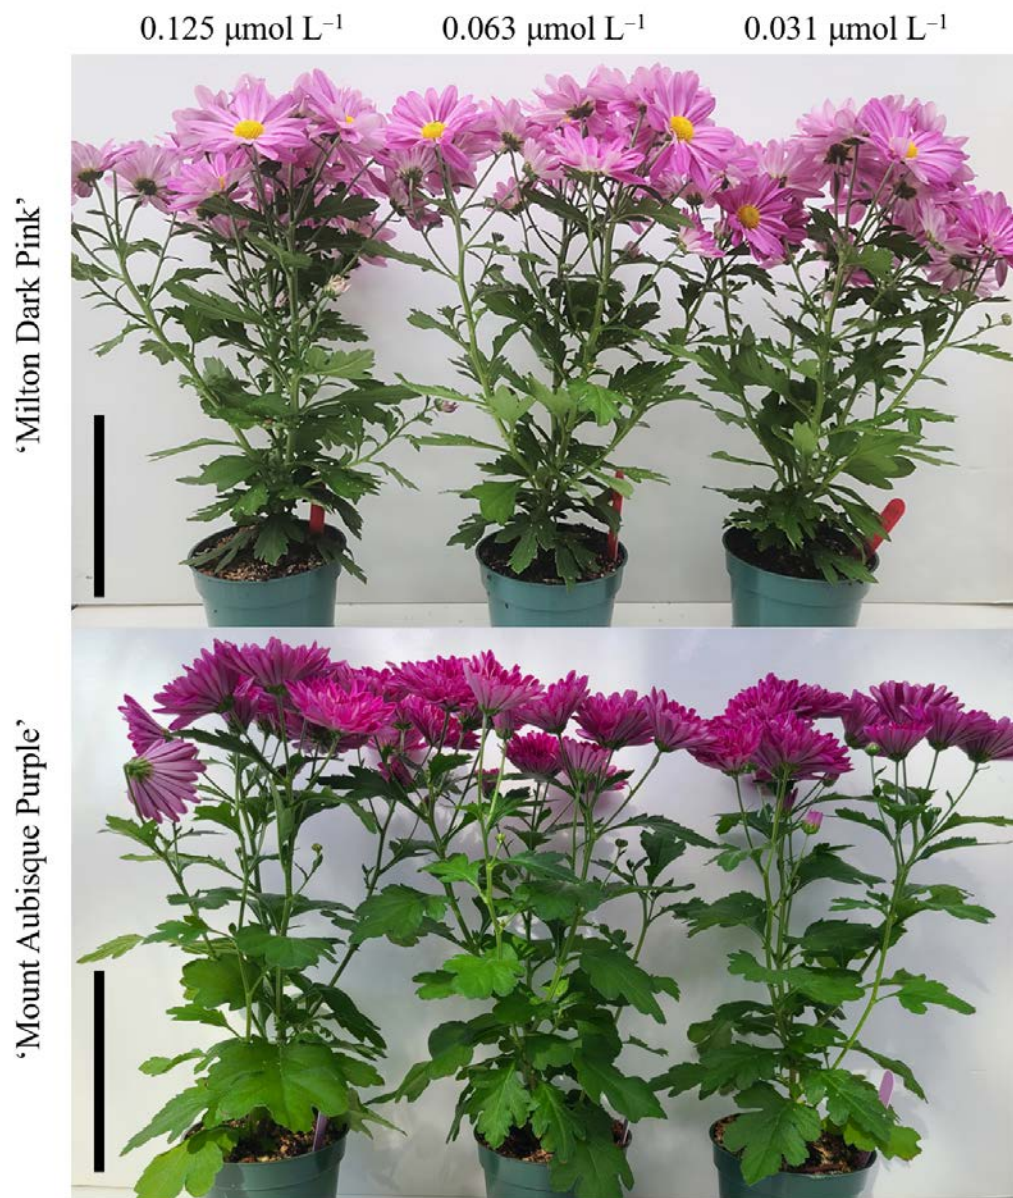

**Figure S1.** Representative plants at harvest at harvest in two chrysanthemum cultivars supplied with varying levels of Mo prior to bud emergence (experiment 2). Black scale bars = 10 cm.

[illegible]

**Figure S2.** Example of the split-plot randomized complete block design experimental setup for all experiments\*. Each of the four blocks consisted of three experimental troughs, each containing ten experimental plants of both ‘Milton Dark Pink’ (Cultivar 1 = C1) and ‘Williamsburg Purple’ or ‘Mount Aubisque Purple’ (Cultivar = C2). The colour of the troughs indicate treatment: treatment 1 (T1), orange; treatment 2 (T2), red; treatment 3 (T3), yellow. Plants coloured in blue were border (B) plants were not included in the analyses and received treatment 1.

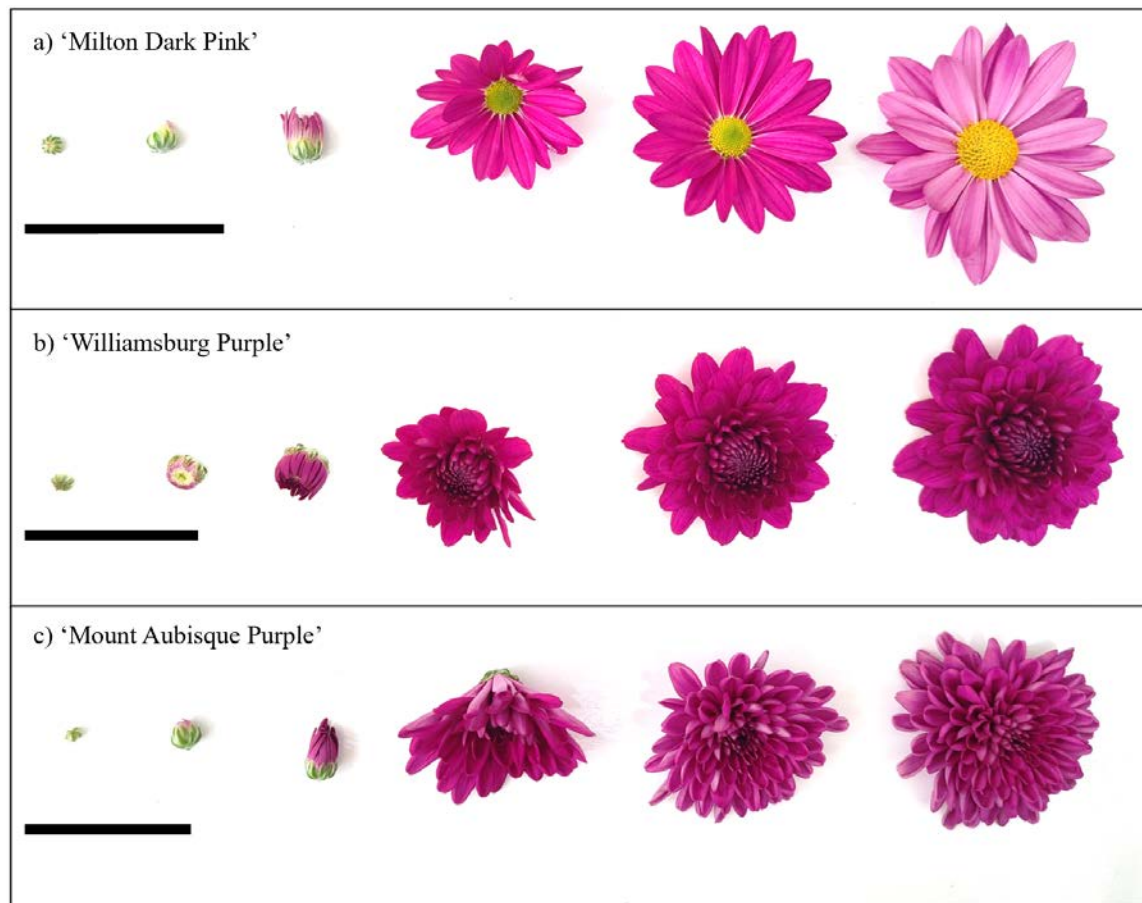

**Figure S3.** Inflorescence development stages of 'Milton Dark Pink' (a), 'Williamsburg Purple' (b), and 'Mount Aubisque Purple' (c) chrysanthemums. Scale from 1-6 from left to right. Stage 1: a formed bud that is completely closed; stage 2 the bloom beginning to emerge from the bud with visible petal colour; stage 3: the bloom opening with fully vertical petals but still mostly closed with sepals approximately half the petal length; stage 4: the bloom opening and mostly open; stage 5: a fully opened bloom; and stage 6: a fully opened bloom in the early stages of petal-tip senescence with fully opened disk flowers. Black scale bar = 5 cm. [16].
